# Supplementary material
Source: PubMed Central journal article supplement (PMC3190865)

## LEGENDS FOR SUPPLEMENTARY FIGURES

**FIGURE S1. A diagram showing the method used to measure the fluorescence intensity of Cep70 at the centrosome.** Two computer-generated squares, called the inner and outer squares, respectively, were centered outside of each centrosome stained with the anti-Cep70 antibody. The fluorescence within each square was measured, and the data were transferred to Microsoft Excel. The measured fluorescence within the inner square included the Cep70 fluorescence and the background fluorescence, whereas the fluorescence within the region between perimeter of outer and inner squares included mostly the background fluorescence. The real fluorescence of Cep70 at the centrosome was obtained by subtraction of the background fluorescence within the inner square from the measured fluorescence within the inner square, by the equation shown in the figure.

**FIGURE S2. Expression of exogenous and endogenous Cep70 in 293T cells.** 293T cells were transfected with GST or GST-Cep70 for 24 hours and lysed in a buffer containing 2% SDS and 50 mM Tris-HCl. The cell lysate was stained with Coomassie blue. Arrowhead, open arrowhead, and arrow indicate the putative positions of GST-Cep70, endogenous Cep70, and GST, respectively. The cell lysate was also examined by immunoblotting (IB) with anti-GST or anti-Cep70 antibodies. Please note that immunoblotting with the anti-Cep70 antibody was unable to detect endogenous Cep70 in 293T cells, although it was able to detect endogenous Cep70 in HeLa cells (Figure 1A).

**FIGURE S3. Immunoblot analysis of the expression of Cep70 and actin in HeLa cells transfected with control or Cep70 siRNAs for 24, 48, or 72 hours.** The relative level of Cep70 was determined by densitometric analysis of the immunoblot bands.

Figure S1 (Shi et al.)

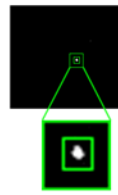

$F$  = Real fluorescence of Cep70 at the centrosome  
 $F_i$  = Measured fluorescence within the inner square  
 $F_o$  = Measured fluorescence within the outer square  
 $F_b$  = Background fluorescence within the inner square  
 $A_i$  = Area of the inner square  
 $A_o$  = Area of the outer square  
 $F = F_i - F_b = F_i - A_i[(F_o - F_i)/(A_o - A_i)]$

Figure S2 (Shi et al.)

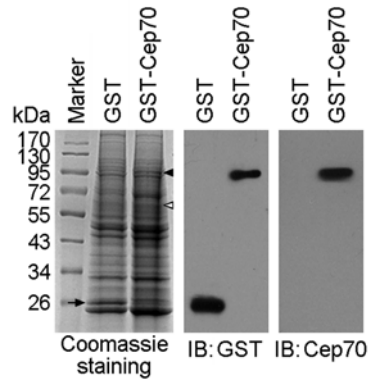

Figure S3 (Shi et al.)

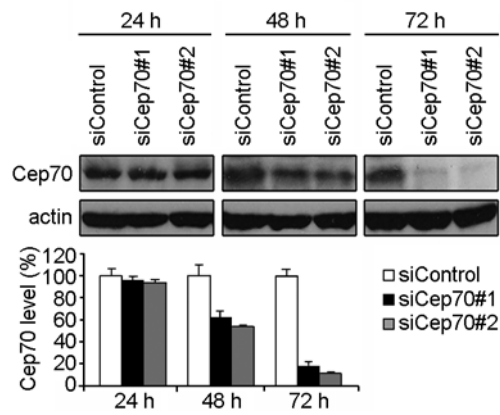

Supplement: supp_M111.252262_Supplementary_figure_and_legends.pdf [file supp_M111.252262_Supplementary_figure_and_legends.pdf]
